# Supplementary material for: How Facial Attractiveness Affects Time Perception: Increased Arousal Results in Temporal Dilation of Attractive Faces
Source: Front Psychol. 2021 Dec 10;12:784099. doi: 10.3389/fpsyg.2021.784099 (PMC8703070; doi:10.3389/fpsyg.2021.784099)
Supplement: Supplementary file 1 [file Table_1.XLSX]

## Sheet: attractiveness
ID	age	high-unattractive	medium-unattractive	low-unattractive	low-attractive	medium-attractive	high-attractive
1	22	3.5	4.25	5.25	4.75	5.5	7.5
2	22	2.75	3.75	5.5	5	5.75	7.5
3	22	3.25	4	5.25	4.75	6	7.5
4	20	2.5	4.75	5.25	4.5	5.75	7
5	21	3	4.5	4.5	5.5	6.25	7.75
6	20	3	3.75	4.75	5.25	6.25	7.75
7	23	2.75	4.75	4.75	5.25	6.75	7
8	20	2.75	4.25	5.25	5.25	6	7.75
9	18	3.25	4.5	4.75	5.5	6	7.5
10	24	3	4	5	5.75	5.75	7.5
11	21	3.25	4	4.25	5	5.75	7.5
12	19	3.25	3.75	4.5	5	6.75	7.25
13	21	3.25	4	4.5	5	6	7.75
14	19	3	4.5	4.75	5.25	6.25	7
15	21	3	4.75	4.75	5.25	6	7.5
16	20	2.75	4.25	4.75	5.25	5.75	7.25
17	22	3	4	5	5.5	6.5	7.25
18	20	3.25	4	4.75	5	6.25	7.75
19	20	3	4	5	5.5	6.25	7.5
20	22	3.5	4	5	5	5.75	7.25
21	18	3	4.25	4.25	4.75	6.5	7.25
22	19	2.75	4	6	5.25	6	7.5
23	23	2.75	4.75	5	5.5	5.75	7
24	19	3.25	4.25	4.5	4.5	6.5	8
25	21	2.5	4	4.75	5.75	5.25	7.75
26	20	2.5	4.5	5	5.5	6.25	8
27	18	3.75	3.5	5	5.25	7.5	7.5
28	20	3	3.5	5.5	5.25	5.25	7.75
29	21	3	4.25	4.75	4.75	6.5	6.75
30	18	3.25	4	5	5	6.25	8
31	24	2.5	4.25	4.25	5	6.75	8
32	22	3	4	5	5.25	6.5	7.75
33	18	3	4.25	5	5.25	5.75	6.75
34	20	2.75	4	4.75	5	6.75	7.75
35	19	3.25	4.25	4.75	5.5	5.75	7.5
36	20	2.75	4	4.75	5	6.5	8.25
37	18	2.75	3.75	5	5.5	6	7.5
38	24	3.25	4.75	4.75	5.5	6.5	7.25
39	23	3.25	4.25	4.75	4.75	6.75	7
40	23	3.25	3.75	4.5	5.25	6.25	7.25

## Sheet: arousal
ID	age	high-unattractive	medium-unattractive	low-unattractive	low-attractive	medium-attractive	high-attractive
1	22	6	4.75	2.25	4	4	7
2	22	5.25	4.5	2.5	2.25	5.5	6.25
3	22	4.25	3.5	3.5	3	5.5	6.25
4	20	5.5	3.25	3	3.75	5.25	5.75
5	21	5.25	3.75	3.75	2.25	5	7
6	20	6	3.75	2.75	2.25	4.5	6.25
7	23	5.5	3	2.5	2.75	5.75	5.25
8	20	5	3.75	2.25	2.5	5	7.25
9	18	5	3.5	3.25	3	5	6
10	24	5.25	3.75	3.25	3.75	4.75	6.5
11	21	4.25	3.5	3.25	3.75	4.75	6.25
12	19	4.5	4.5	3.75	3.5	5.5	6.25
13	21	4.75	4	2.5	3	5	6.75
14	19	5	3.75	3.5	2.75	6.25	6.25
15	21	5	3	2.5	2.75	4	6.25
16	20	5	3	2.75	2.75	4.5	6.25
17	22	5.25	4.25	3	2.75	5.5	6.25
18	20	4.5	4	3.25	3.75	4.75	7
19	20	5	4.5	2.75	2.25	5.25	6.75
20	22	3.5	5	3	3.75	4.75	6
21	18	5.5	4	3.25	3	6	5.75
22	19	5.5	4	2.5	3.5	4.5	6.75
23	23	5.25	4	3	2	5	6.5
24	19	4.25	4.25	3.25	4	5.5	6.75
25	21	6	3.75	3.75	2.75	3.75	6.5
26	20	5.25	4	3.75	3.5	5.5	7.25
27	18	4.25	4.75	3	3	6.5	6.5
28	20	5	4.75	2.5	2.5	4.25	6.25
29	21	4.5	4.5	3	3.75	6	5.75
30	18	4.25	4.25	3.5	3.75	5.75	7.25
31	24	5	4	2.5	3.5	6	6.75
32	22	5.5	3	2.75	3.25	5.5	7
33	18	4.5	3.5	2.25	2.5	5	5.5
34	20	5.25	4.25	3.75	3	5.75	6.5
35	19	4	2.75	2.5	2.75	4.75	7.25
36	20	4.5	3.25	3.25	3	5.25	7
37	18	5.5	4.75	2.5	2.25	5	6
38	24	4.5	3	3.5	2.25	5.25	5.5
39	23	4	4.5	3	3.75	5.75	6
40	23	4.5	4	3.75	4.25	5.75	6.75

## Sheet: reproduction2000
ID	age	high-unattractive	medium-unattractive	low-unattractive	low-attractive	medium-attractive	high-attractive
1	22	1699.56	1637.07	1437.9	1457.77	1809.63	1962.25
2	22	1828.03	1820.5	1658.25	1657.12	1933.05	2041.95
3	22	1861.26	1791.96	1649.54	1665.7	1900.83	2049.18
4	20	1641.29	1628.33	1640.74	1649.09	1910.93	1963.4
5	21	1825.06	1792.15	1589.01	1592.24	1956.51	2016.67
6	20	1823.47	1814.6	1435.11	1479.98	1766.32	1916.97
7	23	1825.69	1813.16	1662.15	1668.47	1890.93	2041.65
8	20	1827.24	1831.22	1676.38	1651.36	1948.69	2010.01
9	18	1654.04	1628.84	1446.8	1482.13	1780.51	1891.91
10	24	1627.62	1601.42	1680.16	1668.52	1949.17	2001.73
11	21	1706.43	1623.46	1447.97	1448.85	1822.91	1870.83
12	19	1835.87	1808.33	1668.07	1656	1961.9	1899.57
13	21	1678.5	1592.4	1660.21	1673.95	1887.65	1983.4
14	19	1741.62	1678.17	1630.9	1663.66	1896.97	1874.77
15	21	1652.38	1620.31	1466.76	1472.13	1798.92	1961.04
16	20	1668.18	1643.78	1666.48	1648.2	1906.51	1857.65
17	22	1837.71	1800.95	1623.2	1634.7	1949.2	1915.38
18	20	1839.89	1818.45	1678.22	1650.81	1951.69	2070.64
19	20	1636.72	1623.69	1652.21	1657.97	1911.46	1893.19
20	22	1644.16	1591.6	1642.5	1650.91	1940.71	1962.06
21	18	1825.62	1799.63	1438.97	1438.25	1737.58	1903.26
22	19	1851.31	1800.01	1636.43	1674.16	1958.83	1929.71
23	23	1823.13	1810.27	1669	1658.15	1958.44	1970.89
24	19	1822.78	1811.95	1468.41	1461.66	1763.84	1960.85
25	21	1636.32	1593.69	1450.51	1443.32	1806.28	2018.11
26	20	1721.46	1598.57	1446.43	1459.97	1805.87	1973.38
27	18	1844.09	1796.24	1437.9	1469.45	1754.38	2079.57
28	20	1840.78	1828.8	1654.14	1658.38	1912.29	1952.03
29	21	1793.39	1802.22	1627.86	1650.68	1914.43	2033.6
30	18	1660.47	1712.31	1457.23	1464.69	1754.62	2022.88
31	24	1839.67	1802.98	1467.24	1441.8	1832.52	1952.96
32	22	1855.62	1814.34	1424.6	1471.26	1766.19	2020.9
33	18	1892.96	1671.68	1448.5	1459.64	1818.12	1888.38
34	20	1825.54	1604.98	1435.91	1446.02	1810.74	2154.22
35	19	1865.11	1793.93	1443.82	1471.47	1747	2008.34
36	20	1725.46	1622.48	1652.25	1688.63	1970.46	2014.84
37	18	1609.01	1619.57	1463.35	1450.42	1779.47	1916.93
38	24	1724.03	1611.37	1471.69	1474.26	1804.92	1917.02
39	23	1831.39	1803.37	1453.31	1475.48	1739.54	2013.25
40	23	1833.36	1792.55	1674.56	1656.61	1920.71	2074.97
